# Supplementary material
Source: publisher figshare collection journal article supplement (https://aacr.figshare.com/articles/dataset/_/22430347)
Supplement: Supplementary file 1 [file 39876679]

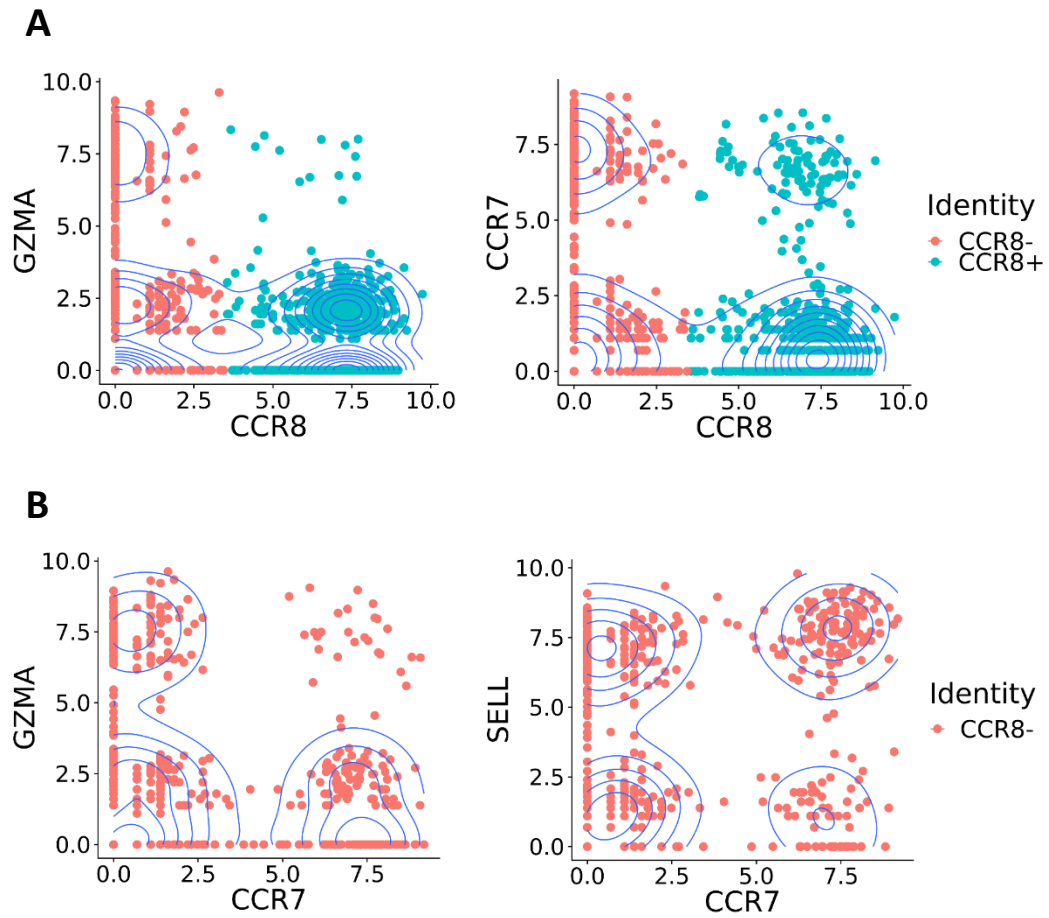

**Supplemental Figure 2: Single cell RNAseq analysis of CCR8<sup>+</sup> and CCR8<sup>-</sup> subpopulations of tumor CD4<sup>+</sup>FOXP3<sup>+</sup> T cells**

Single cell RNAseq analysis of CD4<sup>+</sup>FOXP3<sup>+</sup> T cells examining effector and naïve T cell populations in relationship to CCR8 (*GZMA* vs *CCR8*, and *CCR7* vs *CCR8*) (A). (B) CCR8<sup>-</sup> cells from CD4<sup>+</sup>FOXP3<sup>+</sup> population showing mutual exclusivity between *GZMA* and *CCR7*, and the presence of naïve T<sub>regs</sub> (CCR7<sup>+</sup>SELL<sup>+</sup>).
